# Supplementary material
Source: publisher figshare collection journal article supplement (https://acs.figshare.com/ndownloader/files/7030685)
Supplement: Supplementary file 1 [file 7030685]

## **Supporting Information**

### **Competition-Mediated FRET-Switching DNA Tetrahedron Molecular Beacon (CF-DTMB) for Intracellular Molecular Detection**

Nuli Xie, Jin Huang,\* Xiaohai Yang, Yanjing Yang, Ke Quan, Min Ou, Hongmei Fang and Kemin Wang\*

State Key Laboratory of Chemo/Biosensing and Chemometrics, College of Chemistry and Chemical Engineering, Key Laboratory for Bio-Nanotechnology and Molecular Engineering of Hunan Province, Hunan University, Changsha 410082, China.

\* E-mail: jinhuang@hnu.edu.cn; kmwang@hnu.edu.cn.

## List of Tables and Figures

|                                                                                       |    |
|---------------------------------------------------------------------------------------|----|
| <b>Table S1.</b> The DNA sequences used in this work-----                             | 3  |
| <b>Scheme S1.</b> The assembly mechanism and process of the CF-DTMB-----              | 4  |
| <b>Figure S1.</b> DLS measurement of CF-DTMB-----                                     | 5  |
| <b>Figure S2.</b> Agarose electrophoresis analysis of the nuclease resistance -----   | 6  |
| <b>Figure S3.</b> Cell viability assay (MTT assay) of CF-DTMB-----                    | 7  |
| <b>Figure S4.</b> Thermodynamic studies of the CF-DTMB with or without target DNA---- | 8  |
| <b>Figure S5.</b> Optimization of imaging time for the CF-DTMB with living cells----- | 9  |
| <b>Figure S6.</b> Flow cytometry analysis of CF-DTMB incubated with cells -----       | 10 |
| <b>Figure S7.</b> qRT PCR Analysis of Tk1 mRNA in HepG2 and HL-7702 cells-----        | 11 |
| <b>Figure S8.</b> Co-localization analysis of the CF-DTMB by confocal microscopy----- | 12 |

## DNA Sequences

| Number        | Sequences (5'-3')                                                                                              |
|---------------|----------------------------------------------------------------------------------------------------------------|
| (1)           | AGG CAG TTG AGA CGA ACA TTC CTA AGT CTG AAA TTT ATC ACC<br>CGC CAT AGT AGA CGT ATC ACC                         |
| (2)           | CTT GCT ACA CGA TTC AGA CTT AGG AAT GTT CGA CAT GCG AGG<br>GTC CAA TAC CGA CGA TTA CAG                         |
| (3)           | GGT GAT AAA ACG TGT AGC AAG CTG TAA TCG ATT TTA ATG CCA<br>AAG ACA CTC GCT ACA TTG GCA TAA ATA ACT ACT ATG GCG |
| (4)           | FAM-TAA AAA CGG TAT TGG ACC CTC GCA TGA CTC AAC TGC CTG<br>GTG ATA CGA TAT TT-TAMRA                            |
| (5)           | TGT AGC GAG TGT CTT TGG CAT ACT TGA TCA                                                                        |
| (6)           | TGA TCA AGT ATG CCA AAG ACA CTC GCT ACA                                                                        |
| (7)           | TGA TCA AGT ATT CCA AAG ACA CTC GCT ACA                                                                        |
| (8)           | GGT GAT AAA ACG TGT AGC AAG CTG TAA TCG ATT TTA ACC TGG<br>GAA TAC TCC CCC AGG TAA ATA ACT ACT ATG GCG         |
| (9)           | ACC TGG GGG AGT ATT GCG GAG GAA GGT                                                                            |
| (10)          | ACC TGG GGG AGT ATT ACG TAG TAA CGT                                                                            |
| TK1 forward   | CTC CTA CCC ACT GGT CTG CTT A                                                                                  |
| TK1 reverse   | CAG GGA GAA CAG AAA CTC AGC A                                                                                  |
| GAPDH forward | TGG GTG TGA ACC ATG AGA AGT                                                                                    |
| GAPDH reverse | TGA GTC CTT CCA CGA TAC CAA                                                                                    |

**Table S1.** The DNA sequences used in this work.

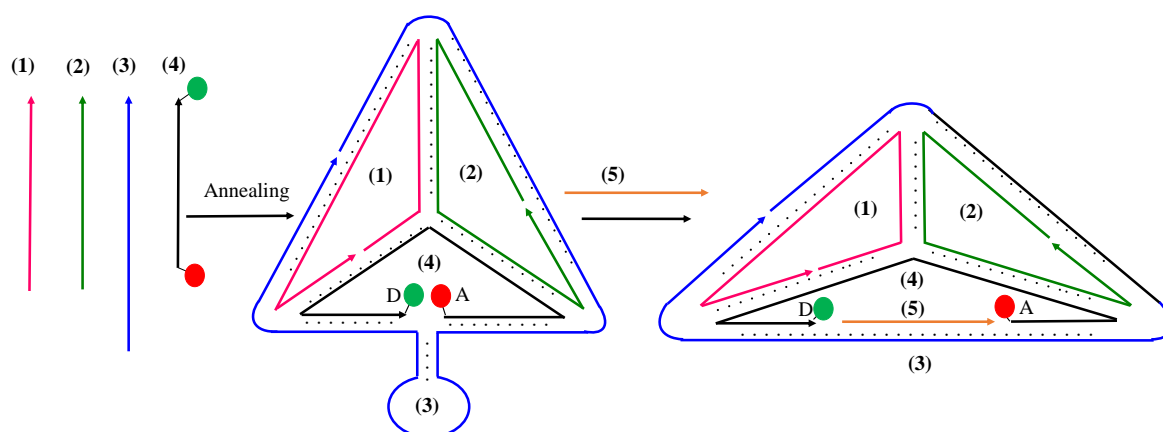

**Scheme S1.** The assembly mechanism and process of the CF-DTMB.

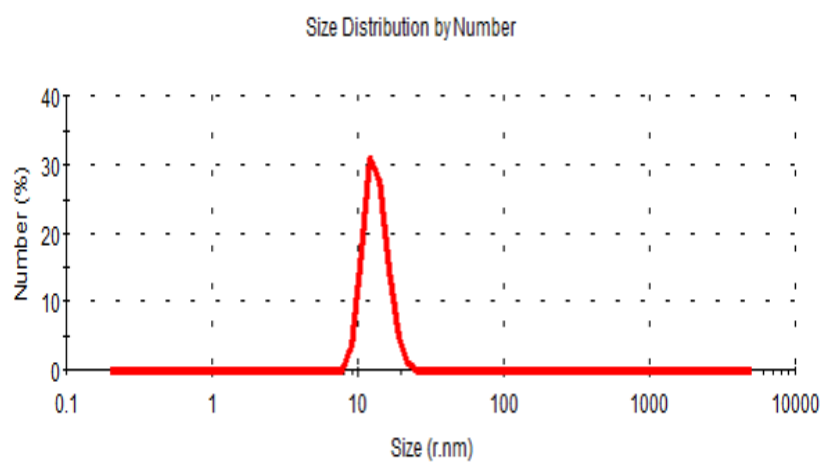

**Figure S1.** DLS measurement of CF-DTMB showed its hydrodynamic diameter of 14.3nm.

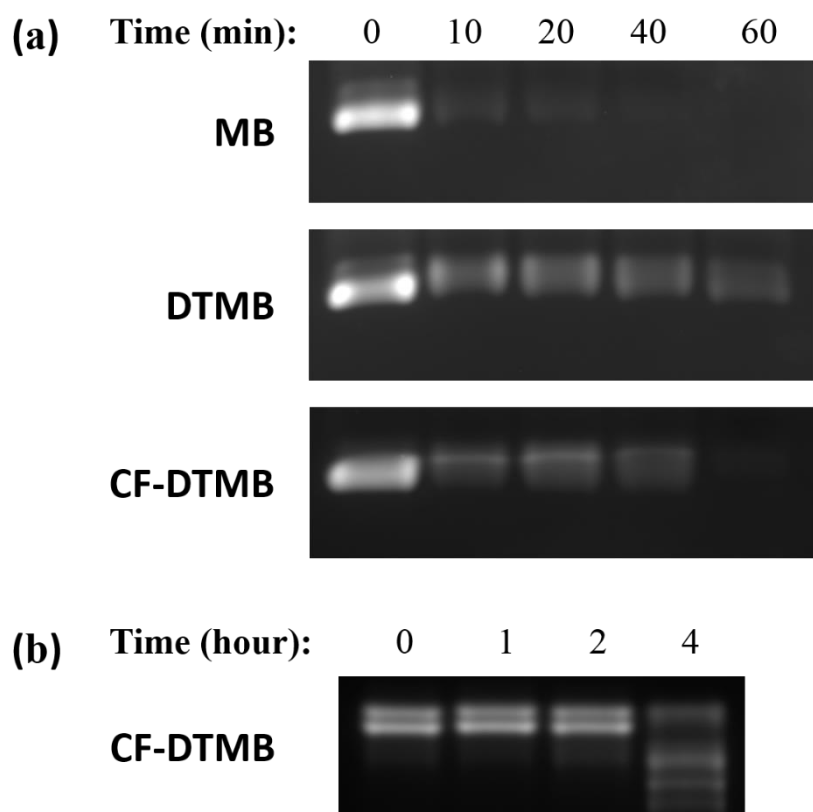

**Figure S2.** The nuclease resistance analysis of MB, DTMB and CF-DTMB by agarose electrophoresis. (a) Gel analysis of DNase I-treated samples with 0min, 10min, 20min, 40min and 60min incubation time, respectively. (b) Gel analysis of Exo III-treated CF-DTMB with 0h, 1h, 2h and 4h incubation time, respectively.

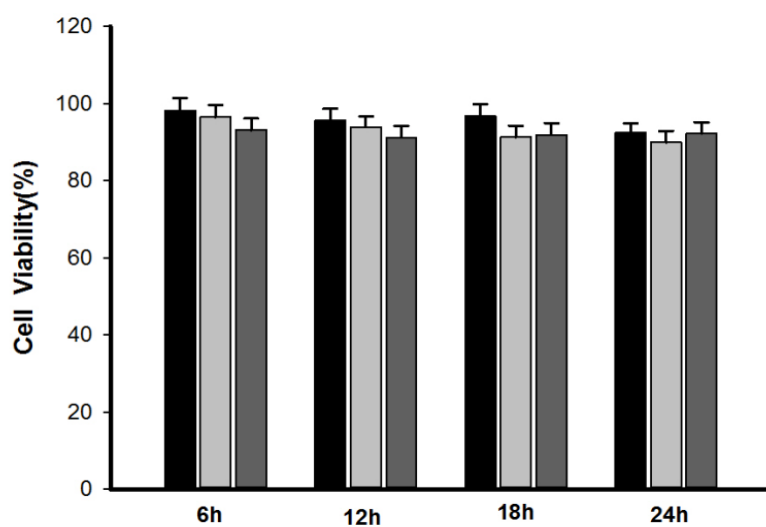

**Figure S3.** Cell viability assay (MTT assay). HepG2 cells were incubated with different concentrations of CF-DTMB for 6 h, 12 h, 18 h and 24 h. Black bar stands for 0 nM probes; light grey bar stands for 50 nM probes; dark gray bar stands for 100 nM probes.

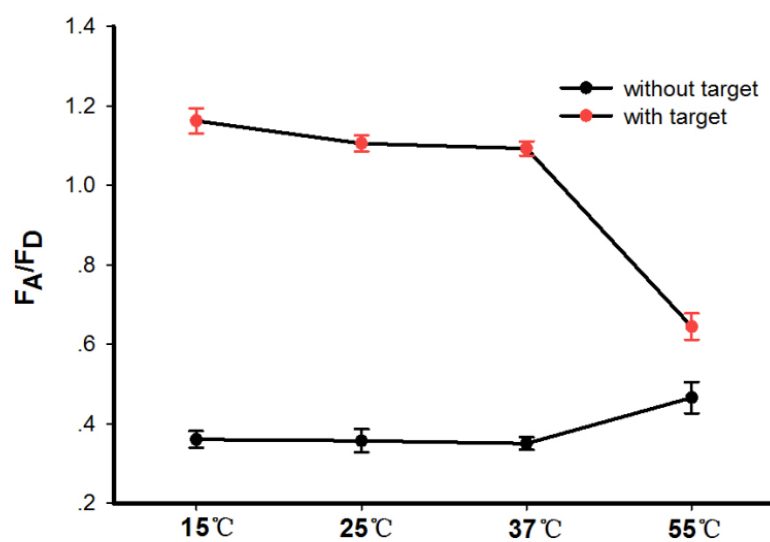

**Figure S4.** Thermodynamic studies of the CF-DTMB with or without target DNA.



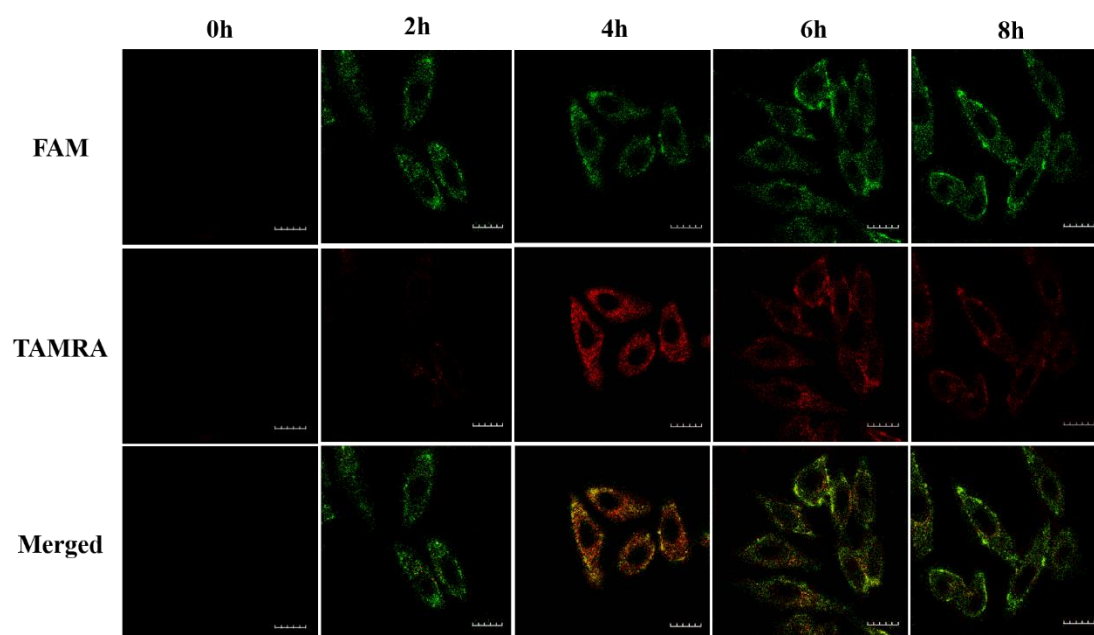

**Figure S5.** Optimization of the best imaging time for the CF-DTMB with living cells. HepG2 cells were incubated with 100 nM probes for different time point at 37°C for confocal microscopy. Scale bars are 20  $\mu$ m.

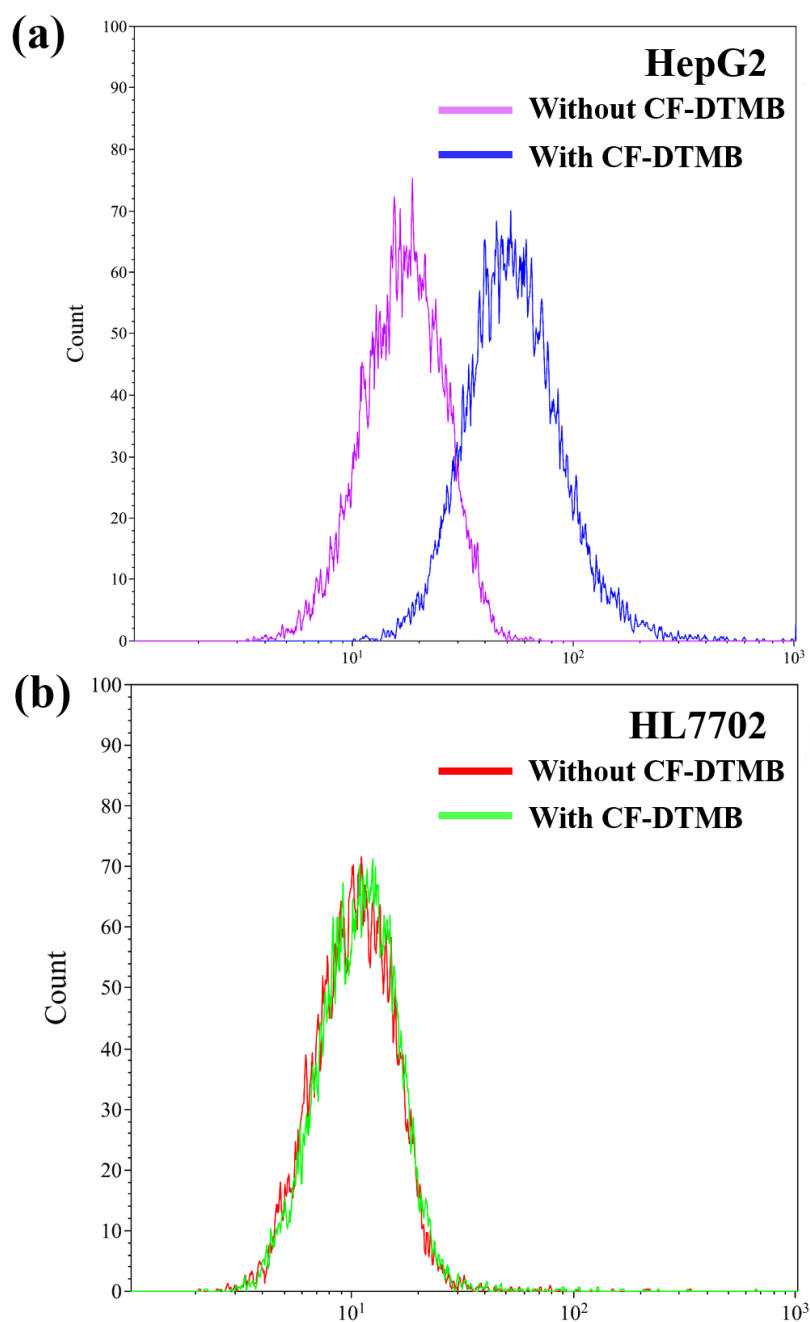

**Figure S6.** (a) and (b) were flow cytometry analysis of CF-DTMB incubated with HepG2 cells and HL-7702 cells, respectively.

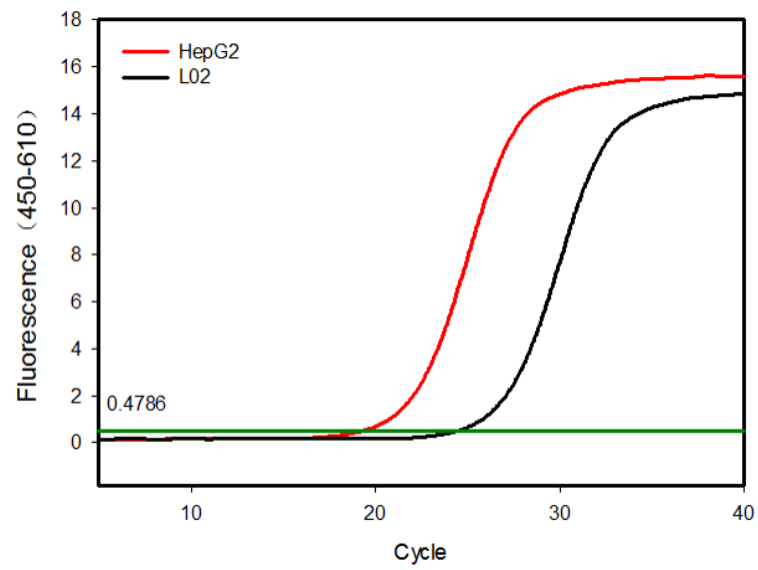

**Figure S7.** Analysis of Tk1 mRNA expressions in HepG2 and HL-7702 cells by qRT-PCR.

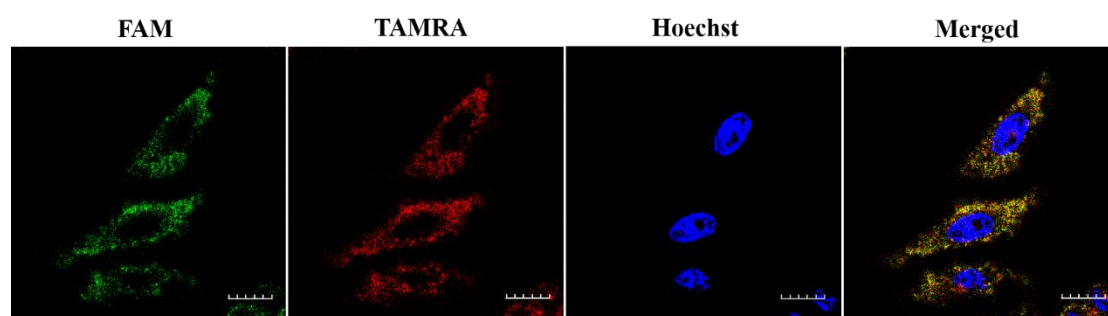

**Figure S8.** Co-localization analysis of the CF-DTMB by confocal microscopy. Cell nucleus was counterstained with Hoechst dye (blue). Green channel and red channel were collected under the excitation of 488nm. Scale bars were 20 μm.
